# Supplementary material for: Inoculation with Pseudomonas spp. in Solanum lycopersicum increases yield and fruit quality under nutrient shortage conditions
Source: PeerJ. 2025 Aug 21;13:e19796. doi: 10.7717/peerj.19796 (PMC12375298; doi:10.7717/peerj.19796)
Supplement: Supplemental Information 1 — Data obtained to build the tables [file peerj-13-19796-s001.xlsx]

## Sheet: Hoja1
		Ftruits parameters
		Solanum lycopersicum
	Firmness (Neuton)
												Treatment	Firmness	SST	Titratable acidity (% citric acid)	Lycopene)
		T50%	T100%	Pseudomonas sp. C13	Pseudomonas sp. C14	Pseudomonas sp. C15	Pseudomonas fluorescens C30	Pseudomona putida ACJ14	Comsortium				(Newton)	(°Brix)	(% Ác. cítrico)	(mg/g)
		4.51094	5.50515	5.22585	4.8216	4.70449	3.9739	5.047	4.87648			T50%	4.26 ± 0.15 b	6.2 ± 0.17 b	0.29 ± 0.004 b	94.40 b
		3.96214	5.91969	4.63295	5.68204	4.9392	5.95938	5.06366	5.4047			T100%	5.42 ± 0.27 ab	6.9 ± 0.24 ab	0.41 ± 0.028 b	112.85 ab
		3.70342	6.14607	4.67999	6.38715	4.88432	6.13186	7.03297	5.35276			Pseudomonas sp. C13	5.15 ± 0.21 ab	6.6 ± 0.29 ab	0.39 ± 0.022 ab	116.74 ab
		4.44724	4.52907	5.77073	5.61344	4.69371	7.1687	5.52426	4.94606			Pseudomonas sp. C14	5.56 ± 0.25 a	7.3 ± 0.19 ab	0.39 ± 0.016 ab	130.22 a
		4.87991	6.24309	5.98535	4.67215	4.81866	3.99889	4.46733	5.74623			Pseudomonas sp. C15	4.95 ± 0.16 ab	6.8 ± 0.21 ab	0.38 ± 0.017 ab	130.66 a
		4.21365	4.74271	4.6452	5.41009	5.89813	4.73732	4.46635	5.80503			Pseudomonas fluorescens C30	5.30 ± 0.45 ab	6.9 ± 0.3 ab	0.39 ± 0.047 ab	116.87 ab
		4.11551	4.85247	5.07738	6.31757	4.69273	5.12834	4.79073	6.05689			Pseudomonas putida ACJ14	5.20 ± 0.34 ab	7.0 ± 0.22 ab	0.40 ± 0.027 ab	132.29 a
	MEAN	4.26183	5.41975	5.14535	5.55772	4.94732	5.29977	5.1989	5.45545			Comsortium	5.46 ± 0.17 ab	7.1 ± 0.29 ab	0.41 ± 0.008 a	123.53 a
	SD	0.38812	0.711356	0.553333	0.662292	0.430645	1.18436	0.889706	0.442774
	SE	0.146696	0.268867	0.20914	0.250323	0.162768	0.447648	0.336277	0.167353
	Total solubles solids
	T50%	T100%	Pseudomonas sp. C13	Pseudomonas sp. C14	Pseudomonas sp. C15	Pseudomonas fluorescens C30	Pseudomona putida ACJ14	Comsortium
	6.112	6.904	6.524	7.444	6.742	6.228	6.946	7.356
	6.714	7.44	7.662	7.708	7.14	7.206	7.608	7.6
	6	6.206	6.652	6.576	6.636	6.776	7.224	7.514
	6.326	7.458	5.884	7.52	7.224	6.392	6.276	7.228
	5.684	6.712	6.434	7.31	6.038	7.868	6.986	6.022
MEAN	6.1672	6.944	6.6312	7.3116	6.756	6.894	7.008	7.144
SD	0.383632	0.526849	0.646465	0.435661	0.473445	0.662477	0.48652	0.643374
SE	0.171565	0.235614	0.289108	0.194834	0.211731	0.296269	0.217578	0.287726
		Titratable acidity
		T50%	T100%	Pseudomonas sp. C13	Pseudomonas sp. C14	Pseudomonas sp. C15	Pseudomonas fluorescens C30	Pseudomona putida ACJ14	Comsortium
		0.293823	0.348787	0.373418	0.347577	0.352024	0.336723	0.376035	0.418049
		0.293298	0.44023	0.46412	0.442721	0.416616	0.425197	0.420963	0.439648
		0.272708	0.345433	0.380167	0.385649	0.355121	0.316946	0.403295	0.403873
		0.295549	0.466084	0.333181	0.414458	0.342116	0.301926	0.315128	0.415341
		0.289802	0.473255	0.420959	0.378218	0.422589	0.553462	0.477982	0.39315
	MEAN	0.289036	0.414758	0.394369	0.393725	0.377693	0.386851	0.398681	0.414012
	SD	0.00936364	0.0629746	0.0498918	0.0362829	0.0386157	0.104692	0.0597919	0.017416
	SE	0.00418755	0.0281631	0.0223123	0.0162262	0.0172695	0.0468196	0.0267398	0.00778869
		Lycopene
		T50%	T100%	Pseudomonas sp. C13	Pseudomonas sp. C14	Pseudomonas sp. C15	Pseudomonas fluorescens C30	Pseudomona putida ACJ14	Comsortium
		96.1202	103.655	131.623	140.984	124.659	100.002	135.162	118.723
		111.417	112.559	110.047	148.861	137.559	99.3166	134.249	111.76
		98.7458	127.057	118.267	125.002	127.628	93.2662	139.5	110.39
		95.2069	106.394	107.079	123.86	130.139	110.732	133.906	124.545
		102.513	109.933	112.102	118.837	120.55	94.522	124.089	101.828
		81.3939	92.9238	126.372	131.509	119.751	104.339	128.769	110.39
		77.3984	94.4078	118.152	152.97	124.888	140.185	109.705	103.426
		105.824	105.367	115.755	109.591	135.961	134.819	124.888	105.709
		103.655	110.047	87.5584	133.335	148.975	111.988	128.997	102.353
		93.3804	136.418	123.974	142.582	122.376	150.801	148.404	194.181
		96.1202	122.49	157.879	103.521	132.194	127.057	161.075	115.916
		71.0689	132.879	92.0105	131.579	143.153	135.39	118.723	183.108
	MEAN	94.4036	112.844	116.735	130.219	130.653	116.868	132.289	123.527
	SD	12.0627	14.1009	18.3082	15.0229	9.23531	19.844	13.4651	31.2588
	SE	3.4822	4.07058	5.28511	4.33674	2.666	5.72847	3.88703	9.02364
