# Supplementary material for: Inoculation with Pseudomonas spp. in Solanum lycopersicum increases yield and fruit quality under nutrient shortage conditions
Source: PeerJ. 2025 Aug 21;13:e19796. doi: 10.7717/peerj.19796 (PMC12375298; doi:10.7717/peerj.19796)
Supplement: Supplemental Information 2 — Data to build root weight graph [file peerj-13-19796-s002.xlsx]

## Sheet: Hoja1
	Root Weight (g)
	Solanum lycopersicum
	T50%	T100%	Pseudomonas sp. C13	Pseudomonas sp. C14	Pseudomonas sp. C15	Pseudomonas fluorescens C30	Pseudomona putida ACJ14	Comsortium
R1	8.6652	13.2811	10.8241	24.3678	8.7247	14.174	17.5459	9.7782
R2	8.8282	13.5066	9.5404	19.9037	9.5523	15.1336	26.9403	9.874
R3	6.6793	14.8544	12.4853	19.9517	12.2021	13.5479	15.5006	8.1568
R4	8.9162	9.6228	13.4163	21.6804	8.6408	10.1158	27.222	10.3788
R5	9.509	14.2384	8.4239	19.7019	6.8656	9.8948	18.4049	8.0946
R6	6.9911	12.7654	9.9135	17.6166	12.229	13.1263	15.526	10.3406
R7	7.845	10.6951	10.1027	22.5793	8.4849	11.2529	21.6532	9.7831
MEAN	8.20486	12.7091	10.6723	20.8288	9.52849	12.4636	20.399	9.48659
SD	1.05966	1.89248	1.73572	2.21838	2.00233	2.05126	5.01285	0.96215
SE	0.400514	0.71529	0.656039	0.838469	0.756809	0.775302	1.89468	0.363658
