# Supplementary material for: Inoculation with Pseudomonas spp. in Solanum lycopersicum increases yield and fruit quality under nutrient shortage conditions
Source: PeerJ. 2025 Aug 21;13:e19796. doi: 10.7717/peerj.19796 (PMC12375298; doi:10.7717/peerj.19796)
Supplement: Supplemental Information 3 — Data to build graph [file peerj-13-19796-s003.xlsx]

## Sheet: Hoja1
	Plant Height (cm)
	90 DDS									130 DDS
	T50%	T100%	Pseudomonas sp. C13	Pseudomonas sp. C14	Pseudomonas sp. C15	Pseudomonas fluorescens C30	Pseudomona putida ACJ14	Comsortium		T50%	T100%	Pseudomonas sp. C13	Pseudomonas sp. C14	Pseudomonas sp. C15	Pseudomonas fluorescens C30	Pseudomona putida ACJ14	Comsortium
R1	31	66	59	83.5	25	39	68	43		132	173	164	202	163	153	183	139
R2	65	46	46	82.5	48	88.5	102	50		155	187	142	201	169	189	222	178
R3	66	64	83	84	90.5	84	81	65		158	191	172	208	179	189	162	189
R4	56	65	55	81	73	77	77	72.5		143	184	152	190	158	203	202	183
R5	46	53	85	82	51	62	86	60		152	162	147	203	152	191	195	178
R6	56	67	47.5	96	89.3	83	96	62		152	165	139	179	172	195	198	190
R7	59	54	45	82	74.4	73	85.5	90.5		131	179	165	179	178	183	163	210
MEAN	54.1429	59.2857	60.0714	84.4286	64.4571	72.3571	85.0714	63.2857	MEAN	146.143	177.286	154.429	194.571	167.286	186.143	189.286	181
SD	12.1851	8.19988	17.1134	5.19959	24.0695	17.0849	11.4033	15.4323	SD	11.0065	11.0561	12.6867	11.9284	10.1278	15.8685	21.6619	21.4942
SE	4.60553	3.09926	6.46826	1.96526	9.09741	6.45747	4.31005	5.83285	SE	4.16006	4.17883	4.79512	4.5085	3.82793	5.99773	8.18743	8.12404
