# Supplementary material for: Inoculation with Pseudomonas spp. in Solanum lycopersicum increases yield and fruit quality under nutrient shortage conditions
Source: PeerJ. 2025 Aug 21;13:e19796. doi: 10.7717/peerj.19796 (PMC12375298; doi:10.7717/peerj.19796)
Supplement: Supplemental Information 4 — Data to build graph [file peerj-13-19796-s004.xlsx]

## Sheet: Hoja1
	Yields (g/plant/5th bunches fruit)
	Solanum lycopersicum
	T50%	T100%	Pseudomonas sp. C13	Pseudomonas sp. C14	Pseudomonas sp. C15	Pseudomonas fluorescens C30	Pseudomona putida ACJ14	Comsortium
R1	1004.06	1391.67	1372.47	1444.34	820.4	1065.09	1667.18	1473.84
R2	931.93	998.122	1544.21	1668.59	1340.9	1298.58	1887.62	1497.15
R3	950.476	1457.66	1160.79	2234.26	1604.98	1219.76	1670.8	1323.56
R4	964.523	1113.5	1524.31	1892.77	1112.24	1863.05	1574.73	1917.59
R5	1000.67	976.994	1558.99	1946.66	960.312	1174.67	1646.67	1307.7
R6	959.312	893.588	842.033	1630.99	1587.92	1680.34	1911.39	1955.64
R7	726.475	980.251	925.697	2438.46	1185.33	2039.23	1730.94	2504.12
MEAN	933.92	1115.97	1275.5	1893.73	1230.3	1477.24	1727.05	1711.37
SD	95.1029	221.3	302.019	350.515	299.271	379.816	126.618	437.093
SE	35.9455	83.6436	114.152	132.482	113.114	143.557	47.857	165.206
